# Supplementary material for: Discovery of genomic intervals that underlie nematode responses to benzimidazoles
Source: PLoS Negl Trop Dis. 2018 Mar 30;12(3):e0006368. doi: 10.1371/journal.pntd.0006368 (PMC5895046; doi:10.1371/journal.pntd.0006368)
Supplement: S2 Table — Previously defined variants distinguishing N2 and CB4856 were annotated based on predicted effects on protein function or expression. Variants of “moderate” or “high” effect are shown for the QTL and the NIL-narrowed interval. (CSV) [file pntd.0006368.s013.csv]

	Chr	Pos	Ref	Alt	Effect	Impact	Gene_Name	Gene_ID	Feature_ID	Exon_Intron_Rank	NT_change	AA_change	Prot_position	NIL_narrowed_interval
1	IV	15476768	C	A	missense_variant	MODERATE	NA	WBGene00013531	Y73F8A.26	6/7	c.1192C>A	p.Leu398Ile	1192/1431	NO
2	IV	15514763	G	A	missense_variant	MODERATE	NA	WBGene00013536	Y73F8A.32a	1/2	c.43C>T	p.Leu15Phe	43/183	NO
3	IV	15514764	A	T	missense_variant	MODERATE	NA	WBGene00013536	Y73F8A.32a	1/2	c.42T>A	p.Phe14Leu	42/183	NO
4	IV	15516470	C	T	missense_variant	MODERATE	NA	WBGene00013537	Y73F8A.33	2/14	c.563C>T	p.Thr188Ile	563/2748	NO
5	IV	15518182	G	A	missense_variant	MODERATE	NA	WBGene00013537	Y73F8A.33	8/14	c.1486G>A	p.Glu496Lys	1486/2748	NO
6	IV	15518471	A	C	missense_variant	MODERATE	NA	WBGene00013537	Y73F8A.33	10/14	c.1681A>C	p.Lys561Gln	1681/2748	NO
7	IV	15518639	G	C	missense_variant	MODERATE	NA	WBGene00013537	Y73F8A.33	10/14	c.1849G>C	p.Glu617Gln	1849/2748	NO
8	IV	15518722	C	G	missense_variant	MODERATE	NA	WBGene00013537	Y73F8A.33	10/14	c.1932C>G	p.His644Gln	1932/2748	NO
9	IV	15518745	C	G	missense_variant	MODERATE	NA	WBGene00013537	Y73F8A.33	10/14	c.1955C>G	p.Thr652Arg	1955/2748	NO
10	IV	15520608	A	G	missense_variant	MODERATE	NA	WBGene00013537	Y73F8A.33	13/14	c.2470A>G	p.Ile824Val	2470/2748	NO
11	IV	15527443	C	A	missense_variant	MODERATE	tag-349	WBGene00013538	Y73F8A.34a.1	3/7	c.367G>T	p.Ala123Ser	367/1458	NO
12	IV	15534613	G	A	missense_variant	MODERATE	NA	WBGene00013539	Y73F8A.35a	11/13	c.1616C>T	p.Ala539Val	1616/1965	NO
13	IV	15537998	G	C	missense_variant	MODERATE	NA	WBGene00013539	Y73F8A.35a	6/13	c.828C>G	p.Ile276Met	828/1965	NO
14	IV	15538476	C	A	missense_variant	MODERATE	NA	WBGene00013539	Y73F8A.35a	4/13	c.532G>T	p.Asp178Tyr	532/1965	NO
15	IV	15551974	T	C	missense_variant	MODERATE	NA	WBGene00013632	Y105C5A.1	3/4	c.1756A>G	p.Lys586Glu	1756/2304	NO
16	IV	15553754	C	T	missense_variant	MODERATE	NA	WBGene00013632	Y105C5A.1	2/4	c.913G>A	p.Ala305Thr	913/2304	NO
17	IV	15554087	A	G	missense_variant	MODERATE	NA	WBGene00013632	Y105C5A.1	1/4	c.623T>C	p.Val208Ala	623/2304	NO
18	IV	15585361	A	G	missense_variant	MODERATE	NA	WBGene00077752	Y105C5A.508	2/2	c.208A>G	p.Lys70Glu	208/351	YES
19	IV	15596217	A	G	missense_variant	MODERATE	pqn-79	WBGene00004160	Y105C5A.6	2/2	c.580A>G	p.Thr194Ala	580/1008	YES
20	IV	15616983	A	G	splice_donor_variant&intron_variant	HIGH	NA	WBGene00013633	Y105C5A.8a	1/5	c.87+2T>C			YES
21	IV	15647262	A	G	missense_variant	MODERATE	NA	WBGene00194913	Y105C5A.1272	2/2	c.178A>G	p.Ser60Gly	178/228	NO
22	IV	15791218	A	G	missense_variant	MODERATE	NA	WBGene00194931	Y105C5A.1273	1/1	c.73A>G	p.Met25Val	73/198	NO
23	IV	15791329	T	A	missense_variant	MODERATE	NA	WBGene00194931	Y105C5A.1273	1/1	c.184T>A	p.Phe62Ile	184/198	NO
24	IV	15823729	A	G	missense_variant	MODERATE	daf-38	WBGene00013642	Y105C5A.23	3/7	c.608A>G	p.Gln203Arg	608/1248	NO
25	IV	15846102	A	G	missense_variant	MODERATE	NA	WBGene00194646	Y105C5A.1270	2/2	c.251T>C	p.Leu84Ser	251/336	NO
26	IV	15851931	G	A	missense_variant	MODERATE	NA	WBGene00013643	Y105C5A.24	7/10	c.943G>A	p.Gly315Ser	943/1437	NO
27	IV	15852684	T	C	missense_variant	MODERATE	NA	WBGene00013643	Y105C5A.24	10/10	c.1384T>C	p.Tyr462His	1384/1437	NO
28	IV	15852695	C	G	missense_variant	MODERATE	NA	WBGene00013643	Y105C5A.24	10/10	c.1395C>G	p.Cys465Trp	1395/1437	NO
29	IV	15875123	C	T	missense_variant&splice_region_variant	MODERATE	gcy-25	WBGene00001549	Y105C5B.2	5/19	c.566C>T	p.Ala189Val	566/3102	NO
30	IV	15876921	C	T	missense_variant	MODERATE	gcy-25	WBGene00001549	Y105C5B.2	8/19	c.1174C>T	p.Pro392Ser	1174/3102	NO
31	IV	15876927	A	G	missense_variant	MODERATE	gcy-25	WBGene00001549	Y105C5B.2	8/19	c.1180A>G	p.Thr394Ala	1180/3102	NO
32	IV	15879753	G	A	missense_variant	MODERATE	gcy-25	WBGene00001549	Y105C5B.2	13/19	c.2206G>A	p.Ala736Thr	2206/3102	NO
33	IV	15884325	T	C	missense_variant	MODERATE	NA	WBGene00013646	Y105C5B.3	1/6	c.104T>C	p.Met35Thr	104/1317	NO
34	IV	15906798	C	A	missense_variant	MODERATE	srv-15	WBGene00005726	Y105C5B.6a	1/8	c.217C>A	p.Leu73Ile	217/1002	NO
