# Supplementary material for: Discovery of genomic intervals that underlie nematode responses to benzimidazoles
Source: PLoS Negl Trop Dis. 2018 Mar 30;12(3):e0006368. doi: 10.1371/journal.pntd.0006368 (PMC5895046; doi:10.1371/journal.pntd.0006368)
Supplement: S6 Table — Each QTL that was discovered for defined trait groups is annotated with its peak position, confidence interval, estimated variance explained, and effect size. Trait legend: EXT (extinction; optical density), TOF (time-of-flight; animal length), red and yellow (fluorescence; pharyngeal pumping), n (object count; brood size). Mappings were carried out with the mean, median, q75 (75th percentile), and q90 (90th percentile) of these traits. (CSV) [file pntd.0006368.s017.csv]

	Drug	Chr	Peak Pos	Trait	Peak LOD	LOD Threshold	Variance Explained	Effect Size	Left	Right
1	Albendazole	V	3025328	mean.EXT	3.31369308090983	2.75132118969912	0.0741684645268664	-0.482805228340589	1390368	4831946
2	Albendazole	V	1504825	mean.TOF	3.01754813106792	2.75132118969912	0.0611673488724571	-0.397888792502755	123876	3646618
3	Albendazole	V	3025328	mean.yellow	2.85932071926778	2.75132118969912	0.0644948997842133	-0.45022023106994	1390368	5078239
4	Albendazole	V	1504825	median.EXT	3.95246182876054	2.75132118969912	0.0788578709716148	-0.451777295653189	1390368	3462286
5	Albendazole	V	1504825	median.red	3.03567425629406	2.75132118969912	0.061515805145847	-0.399020523312455	1390368	5078239
6	Albendazole	V	3025328	median.yellow	3.43934584510906	2.75132118969912	0.0768168515759966	-0.491349560564999	1390368	5078239
7	Albendazole	X	6370138	n	3.62374544088604	2.75132118969912	0.0620635724241805	0.360607766513301	3220115	7393382
8	Albendazole	X	6370138	norm.n	3.83240126819507	2.75132118969912	0.0654056047913378	0.370189566034617	3220115	7393382
9	Albendazole	V	1504825	q75.EXT	3.77228100902579	2.75132118969912	0.0754928734836988	-0.442033165729527	123876	3729896
10	Albendazole	V	1504825	q75.TOF	4.02230333327071	2.75132118969912	0.0801565723653142	-0.455482238568532	1390368	3025328
11	Albendazole	V	3646618	q90.EXT	3.12580645459208	2.75132118969912	0.0701868139976111	-0.469667041324785	1390368	5353373
12	Albendazole	V	2483669	q90.TOF	2.82859958924877	2.75132118969912	0.061029390239479	-0.418482754088875	123876	4831946
13	Fenbendazole	IV	549375	mean.red	3.1944806238151	2.75132118969912	0.0588872360763522	-0.368849320563083	90452	1653406
14	Fenbendazole	IV	549375	mean.TOF	2.87823629545645	2.75132118969912	0.0533395658691023	-0.351045282138037	90452	2741478
15	Fenbendazole	IV	2777733	n	9.96980617223282	2.75132118969912	0.181519950189303	-0.697476498892495	2563732	3447467
16	Fenbendazole	IV	2777733	norm.n	7.99298030363851	2.75132118969912	0.150259869447844	-0.634583682519668	2563732	3447467
17	Fenbendazole	IV	549375	q90.red	3.94202807612822	2.75132118969912	0.0717654720332174	-0.407189129411907	90452	1653406
18	Fenbendazole	IV	549375	q90.yellow	2.95523106909971	2.75132118969912	0.0546957522367519	-0.355480025136598	90452	1653406
19	Thiabendazole	V	10034856	n	2.86867321355511	2.75132118969912	0.0635288351219276	0.444942220088372	5564457	12670017
